# Supplementary material for: MicroRNA-100 Mediates Hydrogen Peroxide-Induced Apoptosis of Human Retinal Pigment Epithelium ARPE-19 Cells
Source: MDPI journal article supplement (doi:10.3390/ph14040314), 2021-04-01
Supplement: s1 [file s1]

Supplementary Figure

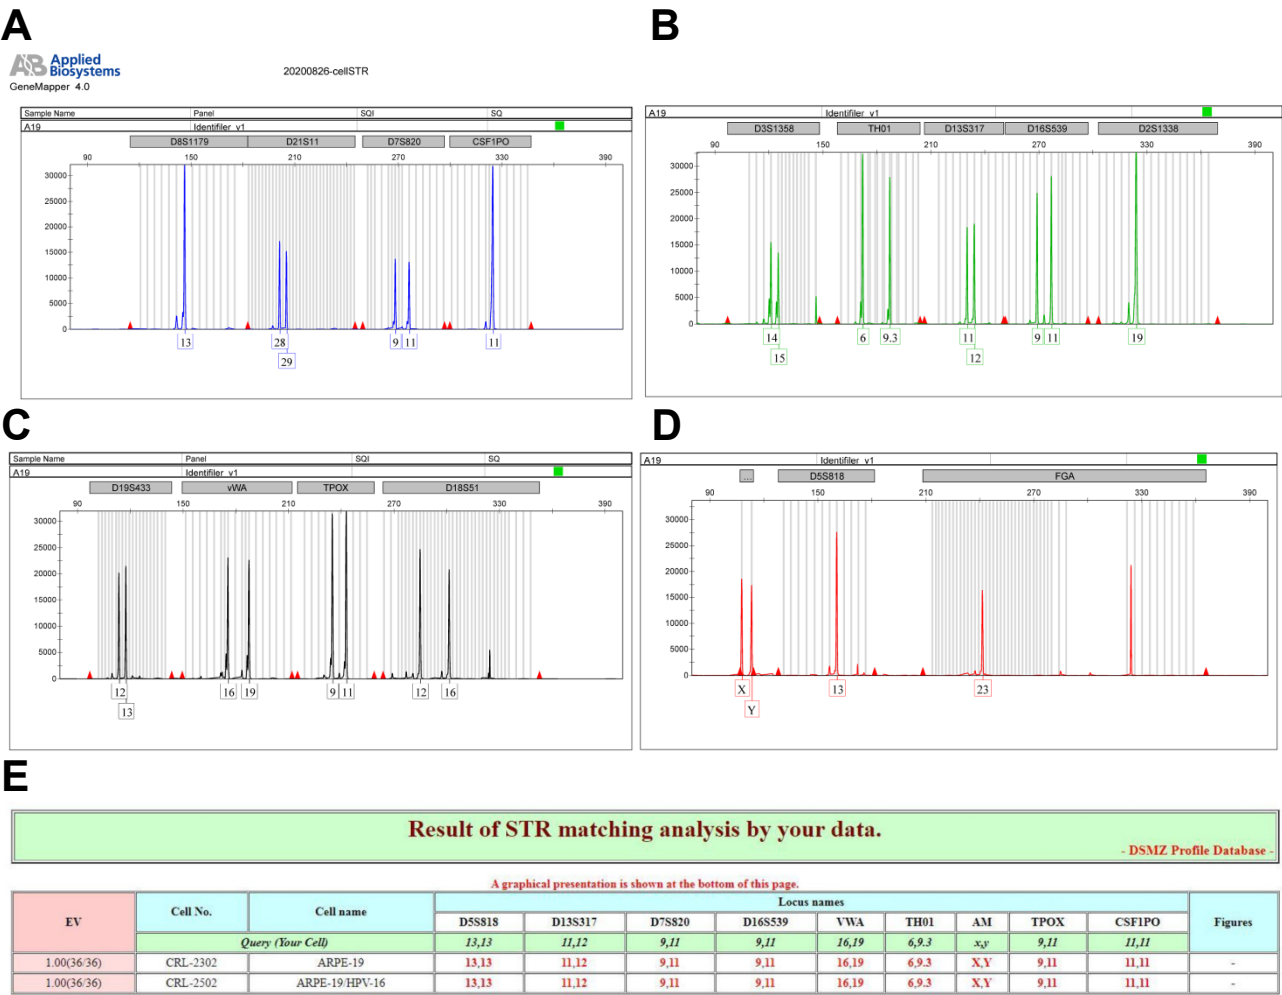

**Supplementary Figure S1.** Short tandem repeat (STR) genotyping analysis on ARPE-19 cell line used in the study. The genomic DNA of cultured ARPE-19 cells was extracted using DNeasy Blood & Tissue Kit (Qiagen#69504) and subjected to multiplex PCR amplification with AmpFLSTR™ Identifiler™ Plus Kit (ThermoFisher#4427368), which simultaneously detected 16 human gene loci. The STR PCR amplified products were resolved by a fluorescent capillary electrophoresis instrument (DNA Analyzer 3730XL), and analyzed by using GeneMapper v4.0 software. Panel (A) showing the detected gene loci and alleles in the tested cells, including D8S1179, D21S11, D7S820 and CSF1PO; panel (B), D3S1358, TH01, D13S317, D16S539, D2S1338; panel (C), D19S433, vWA, TPOX, D18S51; panel (D), D5S818 and FGA. (E) The data of STR matching analysis compared to ARPE-19 cell line (DSMZ no. CRL-2302) and ARPE-19/HPV-16 cell line (DSMZ no. CRL-2502) in DSMZ STR Profile Database showed that evaluation values (EV) of matching algorithm were both 1.0, which identified that the cell line used in this study is ARPE-19.
